# Supplementary material for: Statistical implications of pooling RNA samples for microarray experiments
Source: Springer Nature journal article supplement (doi:10.1186/1471-2105-4-26), 2003-06-24

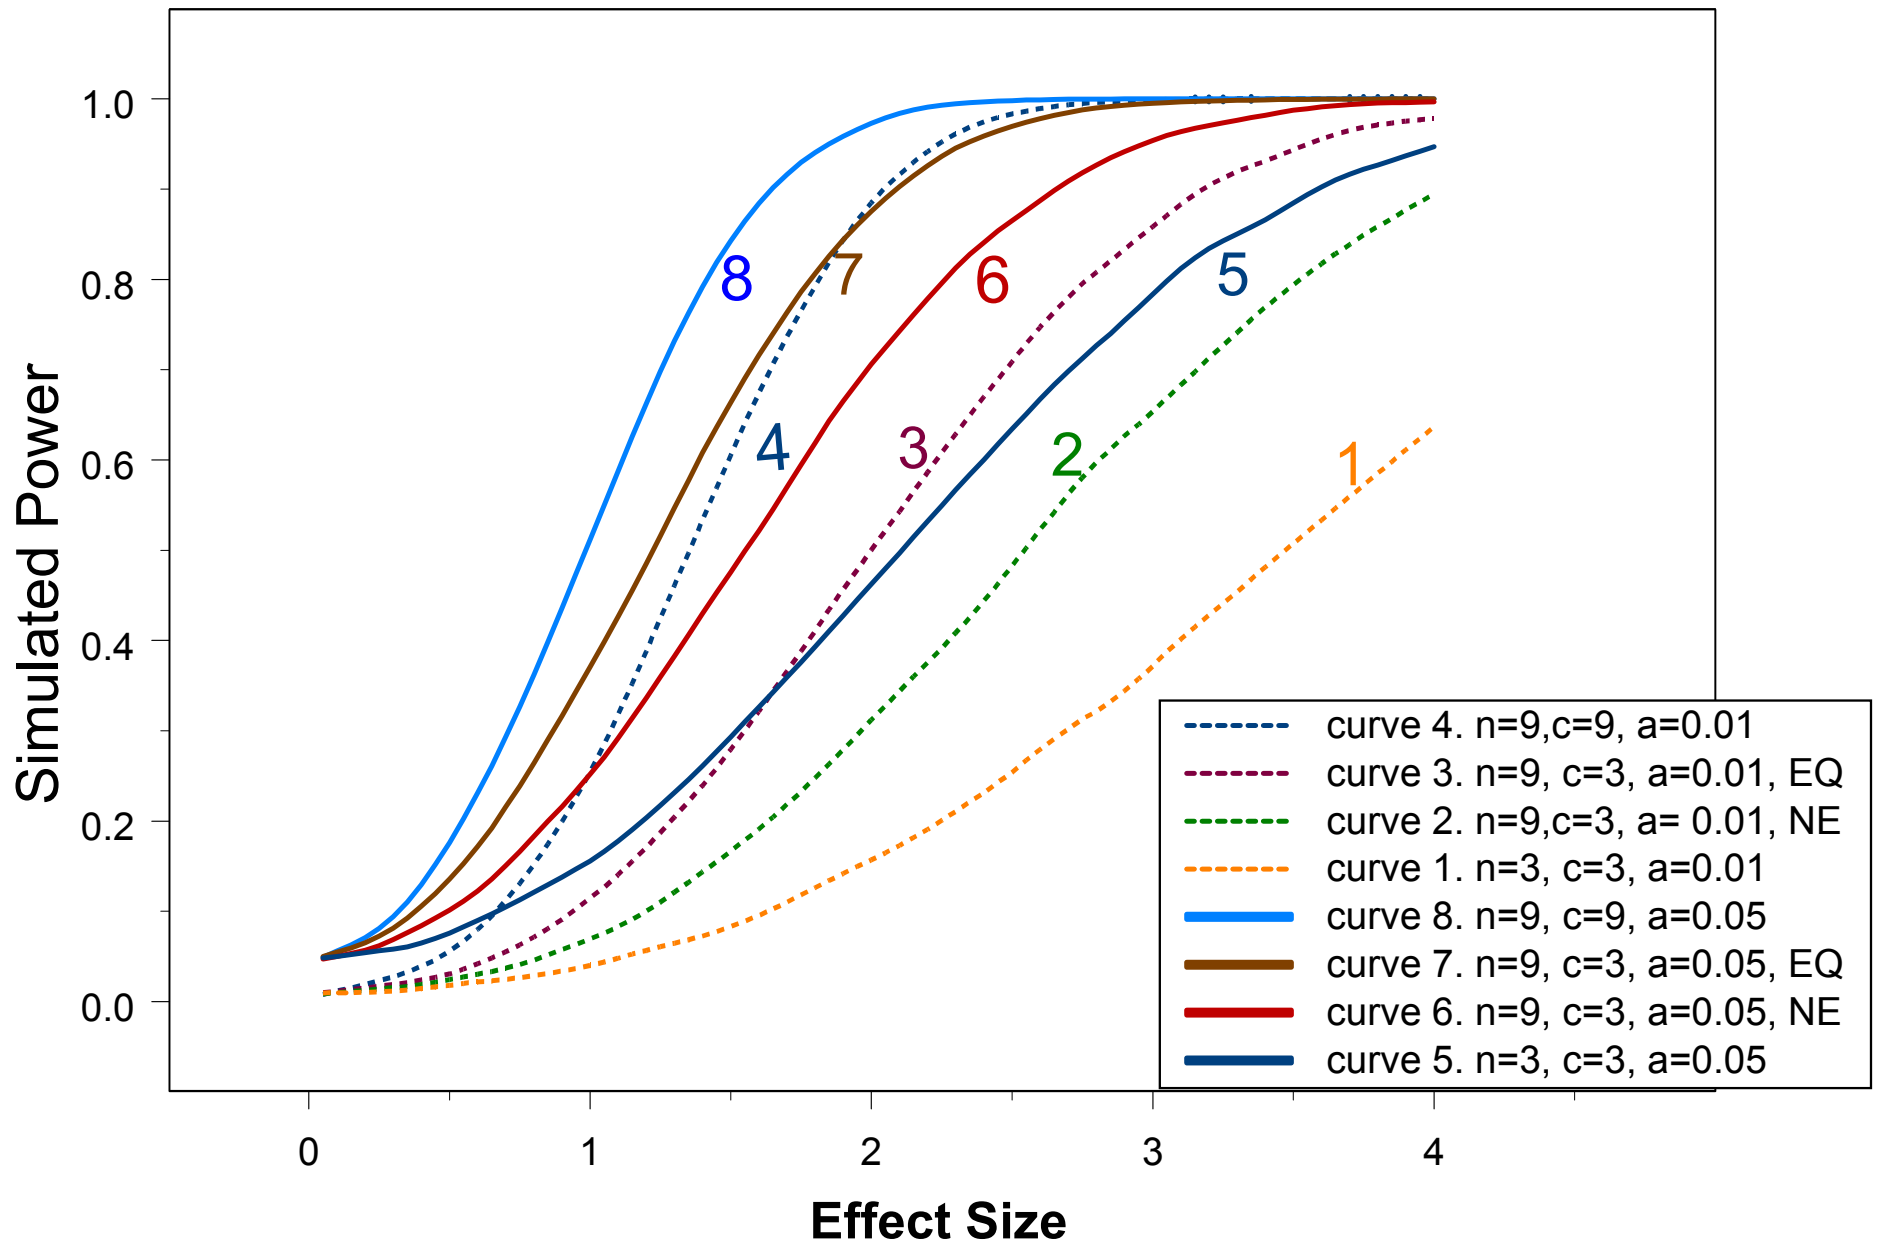

Supplement: 12859_2002_76_MOESM1_ESM.pdf [file 12859_2002_76_MOESM1_ESM.pdf]
